# Supplementary material for: Biochemical investigations of the mechanism of action of small molecules ZL006 and IC87201 as potential inhibitors of the nNOS-PDZ/PSD-95-PDZ interactions
Source: PubMed Central journal article supplement (PMC4503980; doi:10.1038/srep12157), 2015-07-16
Supplement: srep12157-s1.pdf [file srep12157-s1.pdf]

# **Biochemical investigations of the mechanism of action of small molecules ZL006 and IC87201 as potential inhibitors of the nNOS-PDZ/PSD-95-PDZ interactions.**

Anders Bach<sup>1,\*</sup>, Søren W. Pedersen<sup>1</sup>, Liam A. Dorr<sup>2</sup>, Gary Vallon<sup>3</sup>, Isabelle Ripoche<sup>3</sup>, Sylvie Ducki<sup>3</sup>, and Lu-Yun Lian<sup>2,\*</sup>

<sup>1</sup> Department of Drug Design and Pharmacology, Faculty of Health and Medical Sciences, University of Copenhagen, Universitetsparken 2, DK-2100 Copenhagen, Denmark.

<sup>2</sup> NMR Centre for Structural Biology, University of Liverpool, UK L69 7ZB Liverpool

<sup>3</sup> Clermont Université, ENSCCF, CNRS UMR 6296, Institut de Chimie de Clermont-Ferrand, BP10187, F-63174 Aubière, France

## **SUPPLEMENTARY INFORMATION**

## Supplementary Figure S1

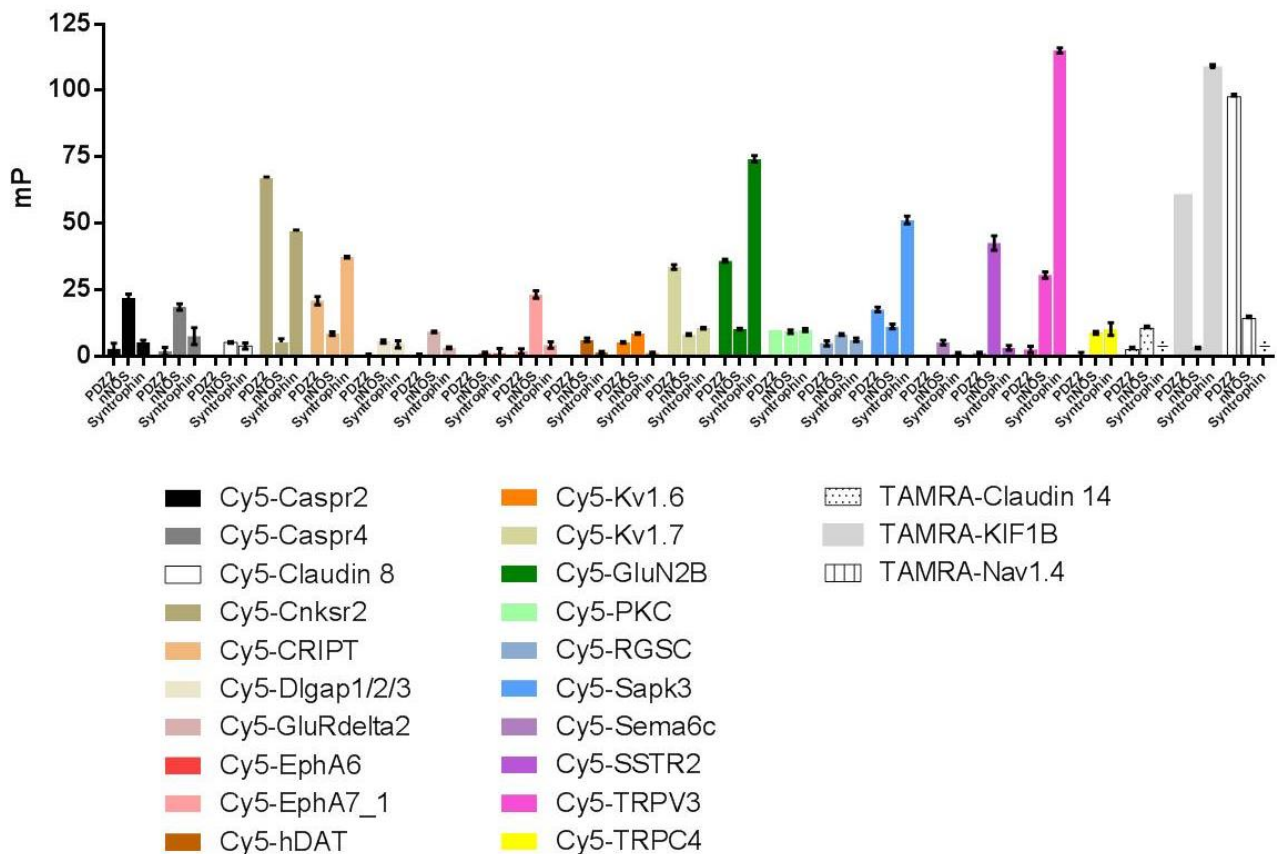

**Figure S1. Screening for selective probes.** An array of fluorescent peptides (Cy5- or TAMRA-probes) known to bind various PDZ domains<sup>1</sup> at 5 nM were screened by FP against PSD-95-PDZ2 (5  $\mu$ M), nNOS-PDZ (5  $\mu$ M), and Syntrophin-PDZ (5  $\mu$ M), to find the most selective probes. Cnksr2 showed the desired selectivity of PDZ2 over nNOS; and Sapk3 showed selectivity of Syntrophin over nNOS. Error bars indicate SEM based on three measurements.  $\div$ : Not tested.

**Supplementary Table S1.** Peptides and peptide-based compounds synthesized and/or used.

| <b>Compound</b>                | <b>Sequence/Structure<sup>a</sup></b>   | <b>M<sub>w</sub><sup>b</sup></b>            | <b>Purity<sup>c</sup></b> |
|--------------------------------|-----------------------------------------|---------------------------------------------|---------------------------|
| Cy5-GluN2B                     | Cy5-CSG-YEKLSSIESDV                     | (Bach et al, 2008 <sup>2</sup> )            |                           |
| Cy5-CRIPT                      | Cy5-CSG-LDTKNYKQTSV                     | (Bach et al, 2008 <sup>2</sup> )            |                           |
| Cy5-Caspr2                     | Cy5-CNNG-IDESKKEWLI                     | 2426.7                                      | >95%                      |
| Cy5-Caspr4                     | Cy5-CNNG-VGENQKEYFF                     | 2426.7                                      | >95%                      |
| Cy5-Claudin 8                  | Cy5-CNNG-PSIYSKSQYV                     | 2337.6                                      | >95%                      |
| Cy5-Claudin 14                 | Cy5-CNNG-HSGYRLNDYV                     | 2389.6                                      | >95%                      |
| Cy5-Cnksr2                     | Cy5-CNNG-HTHSYIETHV                     | 2389.6                                      | >95%                      |
| Cy5-Dlgap1/2/3                 | Cy5-CNNG-IYIPEAQTRL                     | 2369.7                                      | >95%                      |
| Cy5-GluRdelta2                 | Cy5-CNNG-GNDPDRGTSI                     | 2197.3                                      | >95%                      |
| Cy5-EphA6                      | Cy5-CNNG-MHIQEKGFHV                     | 2391.7                                      | >95%                      |
| Cy5-EphA7_1                    | Cy5-CNNG-LHLHGTGIQV                     | 2240.5                                      | >95%                      |
| Cy5-hDAT                       | Cy5-CNNG-QFTLRHWLKV                     | 2493.9                                      | >95%                      |
| Cy5-KIF1B                      | Cy5-CNNG-NLKAGRETTV                     | 2254.5                                      | >95%                      |
| Cy5-Kv1.6                      | Cy5-CNNG-YAEKRMLTEV                     | 2405.7                                      | >95%                      |
| Cy5-Kv1.7                      | Cy5-CNNG-PAGKHMVTEV                     | 2234.5                                      | >95%                      |
| Cy5-Nav1.4                     | Cy5-CNNG-VRPGVKESLV                     | 2249.6                                      | >95%                      |
| Cy5-PKC                        | Cy5-CNNG-FVHPILQSAV                     | 2276.6                                      | >95%                      |
| Cy5-RGSC                       | Cy5-CNNG-KTSAHHATFV                     | 2263.9                                      | >95%                      |
| Cy5-Sapk3                      | Cy5-CNNG-GARVPKETAL                     | 2207.5                                      | >95%                      |
| Cy5-Sema6c                     | Cy5-CNNG-PAPHGGHFNF                     | 2246.5                                      | >95%                      |
| Cy5-SSTR2                      | Cy5-CNNG-SGAEDIHAWV                     | 2226.5                                      | >95%                      |
| Cy5-TRPV3                      | Cy5-CNNG-ELDEFPETSV                     | 2331.5                                      | >95%                      |
| Cy5-TRPC4                      | Cy5-CNNG-AHEDYVTTRL                     | 2370.6                                      | >95%                      |
| TAMRA-Cnksr2                   | TAMRA-NNG-HTHSYIETHV                    | 1922.0                                      | >95%                      |
| Nav1.4-C10                     | NNG-VRPGVKESLV                          | 1368.6                                      | >95%                      |
| GluN2B-C5                      | IESDV                                   | (Bach et al, 2008 <sup>2</sup> )            |                           |
| CRIPT-C11                      | KSG-LDTKNYKQTSV                         | (Bach et al, 2008 <sup>2</sup> )            |                           |
| <i>N</i> -Cyclohexylethyl-ETAV | <i>N</i> -Cyclohexylethyl-ETAV          | (Bach et al, 2008 and 2011 <sup>2,3</sup> ) |                           |
| Tat- <i>N</i> -dimer           | Tat- <i>N</i> -PEG4(IETDV) <sub>2</sub> | (Bach et al, 2012 <sup>4</sup> )            |                           |

<sup>a</sup> CSG, KSG, NNG, and CNNG are tri- or tetrapeptide linkers introduced between the fluorophore (Cy5 or TAMRA) and the PDZ ligand-sequence (See also references<sup>1,2</sup>)

<sup>b</sup> Calculated molecular weight (Da)

<sup>c</sup> Purity determined by ESI-LC-MS

## References

- 1 Stiffler, M. A. *et al.* PDZ domain binding selectivity is optimized across the mouse proteome. *Science* **317**, 364-369 (2007).
- 2 Bach, A. *et al.* Modified peptides as potent inhibitors of the postsynaptic density-95/*N*-methyl-D-aspartate receptor interaction. *J. Med. Chem.* **51**, 6450-6459 (2008).
- 3 Bach, A. *et al.* Cell-permeable and plasma-stable peptidomimetic inhibitors of the postsynaptic density-95/*N*-methyl-D-aspartate receptor interaction. *J. Med. Chem.* **54**, 1333-1346 (2011).
- 4 Bach, A. *et al.* A high-affinity, dimeric inhibitor of PSD-95 bivalently interacts with PDZ1-2 and protects against ischemic brain damage. *Proc. Natl. Acad. Sci. U. S. A.* **109**, 3317-3322 (2012).
